# Supplementary material for: Identification and Characterization of MicroRNAs Involving in Initial Sex Differentiation of Chlamys farreri Gonads
Source: MDPI journal article supplement (doi:10.3390/biology11030456), 2022-03-16

## Figure Legends

**Figure S1.** Histological structure of gonad in juvenile with shell height of 5.0 mm

In, intestine; FC, follicle cell. Arrow shows the position of follicle cells.

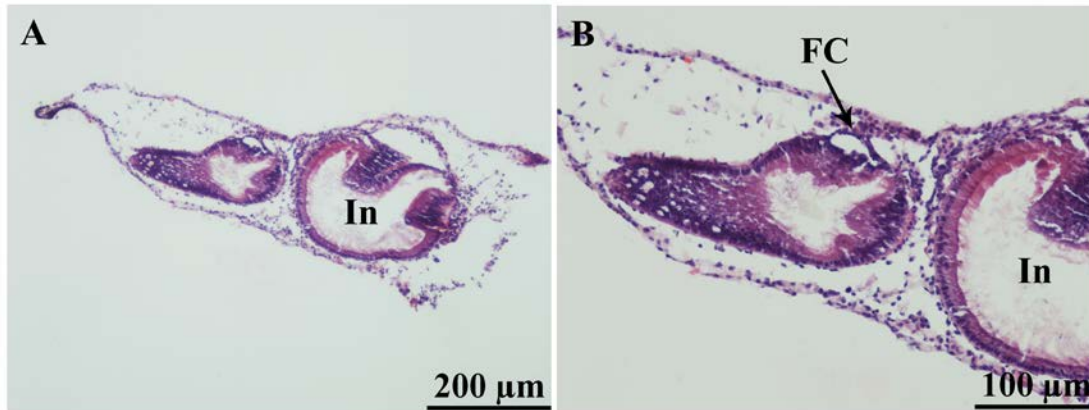

Supplement: s1 [file s1]
