# Supplementary material for: Identification and Characterization of MicroRNAs Involving in Initial Sex Differentiation of Chlamys farreri Gonads
Source: MDPI journal article supplement (doi:10.3390/biology11030456), 2022-03-16
Supplement: s1 [file s1]

# Identification and Characterization of MicroRNAs involving in Initial Sex Differentiation of *Chlamys farreri* Gonads

Xixi Li<sup>1</sup>, Siyu Lin<sup>1</sup>, Shutong Fan<sup>1</sup>, Xiaoting Huang<sup>1</sup>, Zhifeng Zhang<sup>1,2,\*</sup>, Zhenkui Qin<sup>1,\*</sup>

1 Ministry of Education Key Laboratory of Marine Genetics and Breeding, College of Marine Life Sciences, Ocean University of China, Qingdao 266003, China

2 Key Laboratory of Tropical Aquatic Germplasm of Hainan Province, Sanya Oceanographic Institute, Ocean University of China, Sanya 572000, China

\* Correspondence: zzfp107@ouc.edu.cn (Z.Z.); qinzk@ouc.edu.cn (Z.Q.)

Table S1: Specific primers used for RT-qPCR of the miRNAs

| miRNA        | Forward primer sequence (5'-3') |
|--------------|---------------------------------|
| novel_miR5   | TTACCCTGTAGAACCGAGCGAGT         |
| novel_miR7   | CCCGTGATAGCTCAGTTGGTAG          |
| novel_miR54  | GATCTCTCCAAGGCCTTCGG            |
| novel_miR65  | GCAGGAGTTGTCTTGTCTGTT           |
| novel_miR79  | TGAGTAGCAGCCGGGACC              |
| miR-87a-3p_1 | GTGAGCAAAGTTTCAGGTGTG           |
| miR-124a     | TAAGGCACGCGGTGAATGCC            |
| miR-124-3p_4 | TAAGGCACGCGGTGAATGCCA           |
| miR-375_1    | TTTGTTTCGTTTCGGCTCGCGTTA        |
| miR-375-3p_1 | TTTGTTTCGTTTCGGCTCGCGTTATGTGC   |
| miR-1985     | CATTTTTATCAGTCACTGTG            |
| 5S rRNA      | TATCACGTTGAAAACACCGGTTCTCG      |

The reverse primer was a universal primer (Takara, Dalian, China)

Table S2: Specific primers for amplifying the target gene fragments

| Target gene         | Primer Sequence (5'-3')                        |
|---------------------|------------------------------------------------|
| <i>Foxl2</i> -WT-S  | <u>CGAGCT</u> CAACAGTATCCGCCACAACCT            |
| <i>Foxl2</i> -WT-AS | CCT <u>CGAGAG</u> TGGTTGTCAGCAAATAAAGG         |
| <i>Foxl2</i> -MT-S  | GGTGAACGGAAAGGAAG <u>TCCTC</u> GGACTTGGA       |
| <i>Foxl2</i> -MT-AS | <u>GAGGACT</u> TCCTTTCCGTTACCTCCACCTTCCCTCGGCA |
| <i>Klf4</i> -WT-S   | <u>CGAGCT</u> CCTCCCATCTGAAAGCACACT            |
| <i>Klf4</i> -WT-AS  | CCT <u>CGAGG</u> TGGCACTGGAAAGGACGAT           |
| <i>Klf4</i> -MT-S   | GATGCGGCTGGAAAT <u>CCATCT</u> GCTCTGATGAAC     |
| <i>Klf4</i> -MT-AS  | <u>AGATGG</u> ATTTCCAGCCGCATCCCTTCCATGCGC      |

WT: wild-type; MT: mutant type; S: sense; AS: antisense; Single underline: cleavage sites of restriction enzymes; Double underline: mutant bases.

Table S3: The DEMs between testis and ovar

| miRNAs       | Testis (TPM)     | Ovary (TPM)      | Log <sub>2</sub> (fold change) | p-value     | mature miRNAs sequence  |
|--------------|------------------|------------------|--------------------------------|-------------|-------------------------|
| miR-124a     | 71.1125516840033 | 5.93560650481348 | 3.5826368662642                | 0.018463927 | UAAGGCACGCGGUGAAUGCC    |
| miR-124-3p_4 | 766.810265851032 | 268.214396432376 | 1.51548297544166               | 0.01440008  | UAAGGCACGCGGUGAAUGCCA   |
| miR-1985     | 17491.3396364478 | 8001.10215998119 | 1.12837013590651               | 1.14E-05    | UGCCAUUUUUATCAGUCACUGUG |
| miR-375_1    | 1648.50526430289 | 3968.69846821903 | -1.26750746005321              | 5.45E-05    | UUUGUUCGUUCGGCUCGCGUUA  |
| miR-375-3p_1 | 2433.17741785888 | 5279.77768604446 | -1.11763566391377              | 0.001216834 | UUUGUUCGUUCGGCUCGCGUUAU |
| miR-87a-3p_1 | 119.888137867487 | 444.997115730411 | -1.8921070644632               | 0.042434472 | GUGAGCAAAGUUUCAGGUGUG   |
| novel_miR5   | 1905.42516714067 | 199.343983935073 | 3.25678097791346               | 1.53E-08    | UUACCCUGUAGAACCGAGCGAGU |
| novel_miR54  | 74.4307965107132 | 8.63342185017998 | 3.10789528588565               | 0.047379671 | GAUCUCUCCAAGGCCUUCGG    |
| novel_miR65  | 418.93997433732  | 20.2413341945236 | 4.37136725698746               | 0.004382968 | CAGGAGUUGUCUUGUCUGUU    |
| novel_miR7   | 238.380178479512 | 1480.41700967009 | -2.63466743255438              | 0.000801096 | CCCGUGAUAGCUCAGUUGGUAG  |
| novel_miR79  | 8.420054401      | 103.75193373645  | -3.62316486105696              | 0.019962792 | UGAGUAGCAGCCGGGACCGCCCU |
