# Supplementary material for: Identification and Characterization of MicroRNAs Involving in Initial Sex Differentiation of Chlamys farreri Gonads
Source: Biology (Basel). 2022 Mar 16;11(3):456. doi: 10.3390/biology11030456 (PMC8945268; doi:10.3390/biology11030456)
Supplement: Supplementary file 1 [file biology-11-00456-s001.zip]

Archive with 4 entries (4 files):
- Fiugre S1.pdf
- Table S1-S3.pdf
- Table S4.xlsx
- Table S5.xlsx
