# Supplementary material for: Identification and Characterization of MicroRNAs Involving in Initial Sex Differentiation of Chlamys farreri Gonads
Source: Biology (Basel). 2022 Mar 16;11(3):456. doi: 10.3390/biology11030456 (PMC8945268; doi:10.3390/biology11030456)
Supplement: Supplementary file 1 [file biology-11-00456-s001.zip › Table S4.xlsx]

## Sheet: Sheet1
Table S4.Known miRNAs from ovary and testis libraries.
miRNA_ id	mature	length	family
miR-1-3p_3	TGGAATGTAAAGAAGTATGT	20	crm-miR-1-3p,ppc-miR-1
miR-10	ACCCTGTAGATCCGAATTTGT	21	dps-miR-10,aga-miR-10,bmo-miR-10-5p,ame-miR-10-5p,dan-miR-10,der-miR-10,dgr-miR-10,dmo-miR-10,dpe-miR-10,dse-miR-10,dsi-miR-10,dwi-miR-10,dya-miR-10,api-miR-10,nvi-miR-10,nlo-miR-10
miR-10-5p_2	TACCCTGTAGATCCGAATTTGT	22	tca-miR-10-5p,lgi-miR-10,lmi-miR-10-5p,dpu-miR-10,isc-miR-10,bbe-miR-10a-5p,pxy-miR-10-5p
miR-10a-5p_1	TACCCTGTAGATCCGAATTTGTG	23	bfl-miR-10a-5p,sko-miR-10
miR-100-5p	AACCCGTAGATCCGAACTTGT	21	pmi-miR-100-5p
miR-100_2	AACCCGTAGATCCGAACTTGTG	22	aga-miR-100,ame-miR-100-5p,lgi-miR-100,sko-miR-100,bmo-miR-100,bma-miR-100b,aae-miR-100,cqu-miR-100-5p,nvi-miR-100,mse-miR-100,bbe-miR-100-5p
miR-100-5p_4	AACCCGTAGATCCGAACTTGTGT	23	bfl-miR-100-5p,dpu-miR-100,isc-miR-100
miR-100a-5p	AACCCGTAGATCCGAACTTGTGTT	24	asu-miR-100a-5p,asu-miR-100a-5p,prd-miR-100-5p
miR-1175-3p_1	TGAGATTCAACTCCTCCAACTGC	23	cte-miR-1175-3p,lgi-miR-1175-3p
miR-124	TAAGGCACGCGGTGAATGC	19	aae-miR-124,cqu-miR-124,str-miR-124-3p
miR-124a	TAAGGCACGCGGTGAATGCC	20	crm-miR-124a,ppc-miR-124
miR-124-3p_4	TAAGGCACGCGGTGAATGCCA	21	cel-miR-124-3p,cbr-miR-124a,sme-miR-124c-3p,cte-miR-124,lgi-miR-124,spu-miR-124,sme-miR-124c-3p,api-miR-124,egr-miR-124a-3p,emu-miR-124a-3p,asu-miR-124-3p,tur-miR-124-3p,tur-miR-124-3p,mse-miR-124,cbn-miR-124,cbn-miR-124,lva-miR-124-3p
miR-124-3p_3	TAAGGCACGCGGTGAATGCCAA	22	cin-miR-124-3p,cin-miR-124-3p,csa-miR-124,csa-miR-124,bfl-miR-124-3p,sko-miR-124-3p,bma-miR-124,xbo-miR-124,hco-miR-124,hme-miR-124,pmi-miR-124-3p,bbe-miR-124-3p
miR-124-3p_1	TAAGGCACGCGGTGAATGCCAAG	23	dme-miR-124-3p,dps-miR-124,ame-miR-124-3p,aga-miR-124,bmo-miR-124,tca-miR-124-3p,dan-miR-124,der-miR-124,dgr-miR-124,dmo-miR-124,dpe-miR-124,dse-miR-124,dsi-miR-124,dvi-miR-124-3p,dwi-miR-124,dya-miR-124,dpu-miR-124,isc-miR-124,nvi-miR-124
miR-133-3p_2	TTGGTCCCCTTCAACCAGCTG	21	cin-miR-133-3p
miR-133-3p_5	TTGGTCCCCTTCAACCAGCTGT	22	dme-miR-133-3p,dps-miR-133,ame-miR-133-3p,aga-miR-133,bmo-miR-133,tca-miR-133-3p,dan-miR-133,der-miR-133,dgr-miR-133,dmo-miR-133,dpe-miR-133,dse-miR-133,dsi-miR-133,dvi-miR-133-3p,dwi-miR-133,dya-miR-133,cte-miR-133,lgi-miR-133-3p,sko-miR-133,dpu-miR-133,isc-miR-133,aae-miR-133,cqu-miR-133,nvi-miR-133,ngi-miR-133,nlo-miR-133,tur-miR-133-3p,mse-miR-133,bbe-miR-133-5p
miR-153_4	TTGCATAGTCACAAAAGTGATC	22	cte-miR-153,lgi-miR-153
miR-184_1	TGGACGGAGAACTGATAAGGG	21	aga-miR-184,bfl-miR-184-3p
miR-184-3p_3	TGGACGGAGAACTGATAAGGGC	22	dme-miR-184-3p,dps-miR-184,ame-miR-184-3p,cin-miR-184,tca-miR-184-3p,dan-miR-184-3p,der-miR-184-3p,dgr-miR-184-3p,dmo-miR-184-3p,dpe-miR-184-3p,dse-miR-184-3p,dsi-miR-184-3p,dvi-miR-184-3p,dwi-miR-184-3p,dya-miR-184-3p,cte-miR-184a,lgi-miR-184,sko-miR-184-3p,spu-miR-184,isc-miR-184,api-miR-184a,aae-miR-184,cqu-miR-184,nvi-miR-184,ngi-miR-184,nlo-miR-184,tur-miR-184-3p,mse-miR-184,hme-miR-184,pmi-…
miR-184-3p_5	ACTGGACGGAGAACTGATAAGGGC	24	bmo-miR-184-3p
miR-190_5	AGATATGTTTGATATATTTGGTGG	24	cte-miR-190
miR-1985	TGCCATTTTTATCAGTCACTGTG	23	hru-miR-1985
miR-1990	AGTAAGTTGATGGGGTCCCAGG	22	hru-miR-1990,lgi-miR-1990
miR-1992_1	TCAGCAGTTGTACCACTGATTTG	23	lgi-miR-1992
miR-1994a	TGAGACAGTGTGTCCTCCCTTG	22	lgi-miR-1994a
miR-2a-3p_6	TATCACAGCCAGCTTTGATGAGC	23	dme-miR-2a-3p,dme-miR-2a-3p,dps-miR-2a,dps-miR-2a,ame-miR-2-3p,ame-miR-2-3p,aga-miR-2,aga-miR-2,ame-miR-2-3p,bmo-miR-2a-3p,bmo-miR-2a-3p,tca-miR-2-3p,tca-miR-2-3p,tca-miR-2-3p,dan-miR-2a,dan-miR-2a,der-miR-2a,der-miR-2a,dgr-miR-2a,dgr-miR-2a,dmo-miR-2a,dmo-miR-2a,dpe-miR-2a,dpe-miR-2a,dse-miR-2a,dse-miR-2a,dse-miR-2a,dsi-miR-2a,dsi-miR-2a,dvi-miR-2a-3p,dvi-miR-2a-3p,dwi-miR-2a,dwi-miR-2a,dya-miR-…
miR-2d_2	TATCACAGCCTGCTTGGATCAGT	23	lgi-miR-2d
miR-2b_5	TATCACAGCCAGCTTTGATGAGCT	24	aae-miR-2b
miR-29b	TAGCACCATTTGAAATCAGTG	21	cte-miR-29b
miR-29b-3p	TAGCACCATTTGAAATCAGT	20	ame-miR-29b-3p,nvi-miR-29b,ngi-miR-29b
miR-29a_1	TAGCACCATTTGAAATCAGTTT	22	cte-miR-29a,lgi-miR-29
miR-216a	TAATCTCAGCTGGTAATTCTGAG	23	lgi-miR-216a
miR-216b	TAATATCAGCTGGTAATCCTGAG	23	lgi-miR-216b
miR-219_4	TGATTGTCCAAACGCAATTCTT	22	dpu-miR-219,isc-miR-219
miR-219_3	TGATTGTCCAAACGCAATTCTTG	23	dps-miR-219,ame-miR-219-5p,aga-miR-219,dan-miR-219,der-miR-219,dgr-miR-219,dmo-miR-219,dpe-miR-219,dse-miR-219,dsi-miR-219,dvi-miR-219-5p,dwi-miR-219,dya-miR-219,aae-miR-219,api-miR-219,nvi-miR-219,ngi-miR-219,nlo-miR-219,sko-miR-219,pmi-miR-219-5p
miR-242a	TTGCGTAGGCGTTGTGCACAG	21	lgi-miR-242a
miR-242_7	TTGCGTAGGCGTTGTGCACAGT	22	spu-miR-242,pmi-miR-242-5p,lva-miR-242-5p
miR-263b_1	AATGGCACTGGTAGAATTCACGG	23	lgi-miR-263b
miR-279a_1	TGACTAGATCCACACTCAT	19	bmo-miR-279a
miR-279	TGACTAGATCCACACTCATCC	21	cte-miR-279,api-miR-279a
miR-279_1	TGACTAGATCCACACTCATCCA	22	lgi-miR-279,tca-miR-279b-3p,dpu-miR-279a,isc-miR-279,mse-miR-279a,hme-miR-279a,ame-miR-279d-3p
miR-31_3	AGGCAAGATGTTGGCATAGCT	21	cte-miR-31,lgi-miR-31,spu-miR-31,pmi-miR-31-5p,pmi-miR-31-5p,pmi-miR-31-5p,lva-miR-31-5p
miR-31_2	AGGCAAGATGTTGGCATAGCTG	22	sko-miR-31,crm-miR-72-5p,ppc-miR-72,prd-miR-72-5p
miR-315_1	TTTTGATTGTTGCTCAGAAAG	21	sko-miR-315
miR-315-5p	TTTTGATTGTTGCTCAGAAAGC	22	dme-miR-315-5p,dps-miR-315,ame-miR-315-5p,aga-miR-315,dan-miR-315,der-miR-315,dgr-miR-315,dmo-miR-315,dpe-miR-315,dse-miR-315,dsi-miR-315,dwi-miR-315,dya-miR-315,tca-miR-315,dpu-miR-315,aae-miR-315-5p,cqu-miR-315,nvi-miR-315,nlo-miR-315
miR-315a	TTTTGATTGTTGCTCAGAAAGCC	23	dvi-miR-315a,cte-miR-315,lgi-miR-315,api-miR-315
miR-317_2	TGAACACAGCTGGTGGTATCT	21	aae-miR-317,aae-miR-317,cqu-miR-317-3p,api-miR-317,cqu-miR-317-3p
miR-33_3	GTGCATTGTAGTTGCATTGCA	21	cte-miR-33,bmo-miR-33-5p,aae-miR-33,cqu-miR-33,mse-miR-33,bbe-miR-33-5p,bbe-miR-33-5p,aga-miR-33-5p
miR-34_1	TGGCAGTGTGGTTAGCTGGT	20	aga-miR-34,tca-miR-34-5p
miR-34_2	GGCAGTGTGGTTAGCTGGTTG	21	ngi-miR-34,nlo-miR-34
miR-34-5p_4	TGGCAGTGTGGTTAGCTGGTT	21	dvi-miR-34-5p,tur-miR-34-5p
miR-34_5	TGGCAGTGTGGTTAGCTGGTTG	22	dps-miR-34,bmo-miR-34-5p,dan-miR-34,der-miR-34,dgr-miR-34,dmo-miR-34,dpe-miR-34,dse-miR-34,dsi-miR-34,dwi-miR-34,dya-miR-34,sko-miR-34-5p,aae-miR-34-5p,nvi-miR-34,hme-miR-34,hme-miR-34,pmi-miR-34-5p,prd-miR-34-5p,str-miR-34a-5p
miR-34_4	TGGCAGTGTGGTTAGCTGGTTGT	23	cte-miR-34,bma-miR-34,asu-miR-34-5p,mse-miR-34
miR-375_1	TTTGTTCGTTCGGCTCGCGTTA	22	lgi-miR-375
miR-375-3p_1	TTTGTTCGTTCGGCTCGCGTTAT	23	bbe-miR-375-3p
miR-7	TGGAAGACTAGTGATTTTGTTG	22	odi-miR-7,odi-miR-7,cin-miR-7-5p,hme-miR-7
miR-7-5p_4	TGGAAGACTAGTGATTTTGTTGT	23	dme-miR-7-5p,dps-miR-7,ame-miR-7-5p,aga-miR-7,bmo-miR-7-5p,csa-miR-7,dan-miR-7,der-miR-7,dgr-miR-7,dmo-miR-7,dpe-miR-7,dse-miR-7,dsi-miR-7,dwi-miR-7,dya-miR-7,bfl-miR-7,sko-miR-7-5p,spu-miR-7,dpu-miR-7,isc-miR-7,aae-miR-7,cqu-miR-7,nvi-miR-7,nlo-miR-7,pmi-miR-7-5p,lva-miR-7-5p,bbe-miR-7-5p
miR-7-5p_6	TGGAAGACTAGTGATTTTGTTGTT	24	dvi-miR-7-5p,lgi-miR-7,api-miR-7,tur-miR-7-5p,mse-miR-7
miR-71	TGAAAGACATGGGTAGTGA	19	cbr-miR-71,bmo-miR-71-5p,ame-miR-71-5p,bma-miR-71,nvi-miR-71
miR-71c-5p	TGAAAGACATGGGTAGTGAGAT	22	sme-miR-71c-5p,tca-miR-71-5p,bfl-miR-71-5p,pmi-miR-71-5p,bbe-miR-71-5p
miR-71_5	TGAAAGACATGGGTAGTGAGATG	23	cte-miR-71,dpu-miR-71,isc-miR-71,api-miR-71,tur-miR-71-5p,tur-miR-71-5p,mse-miR-71
miR-72-5p	AGGCAAGATGTTGGCATAGCTGA	23	cel-miR-72-5p,bma-miR-72,asu-miR-72-5p,hco-miR-72,str-miR-72-5p
miR-750_3	CAGATCTAACTCTTCCAGCTCA	22	lgi-miR-750
miR-750-3p_3	CCAGATCTAACTCTTCCAGCTC	22	ame-miR-750-3p
miR-750_1	CCAGATCTAACTCTTCCAGCTCA	23	cte-miR-750,isc-miR-750
miR-8-3p_5	TAATACTGTCAGGTAAAGATGT	22	cqu-miR-8-3p,hme-miR-8
miR-8-3p_1	TAATACTGTCAGGTAAAGATGTC	23	dme-miR-8-3p,dps-miR-8,ame-miR-8-3p,aga-miR-8,bmo-miR-8-3p,tca-miR-8-3p,dan-miR-8,der-miR-8,dgr-miR-8,dmo-miR-8,dpe-miR-8,dse-miR-8,dsi-miR-8,dvi-miR-8-3p,dwi-miR-8,dya-miR-8,cte-miR-8,lgi-miR-8,dpu-miR-8,isc-miR-8,aae-miR-8-3p,nvi-miR-8,nlo-miR-8,mse-miR-8
miR-87_1	GTGAGCAAAGTTTCAGGTGT	20	cbr-miR-87,ame-miR-87-3p,ame-miR-87-3p,egr-miR-87-3p,emu-miR-87-3p
miR-87a-3p_1	GTGAGCAAAGTTTCAGGTGTG	21	tca-miR-87a-3p,isc-miR-87
miR-9-5p_2	TCTTTGGTTATCTAGCTGTAT	21	sko-miR-9-5p,tca-miR-9a-5p
miR-9-5p_5	TCTTTGGTTATCTAGCTGTATG	22	spu-miR-9-5p,bfl-miR-9-5p,bfl-miR-9-5p,ppc-miR-9,lva-miR-9-5p
miR-9a-5p	TCTTTGGTTATCTAGCTGTATGA	23	dme-miR-9a-5p,dps-miR-9a,ame-miR-9a-5p,aga-miR-9a,bmo-miR-9a-5p,dan-miR-9a,der-miR-9a,dgr-miR-9a,dmo-miR-9a,dpe-miR-9a,dse-miR-9a,dsi-miR-9a,dvi-miR-9a-5p,dwi-miR-9a,dya-miR-9a,cte-miR-9-5p,lgi-miR-9-5p,lmi-miR-9a-5p,dpu-miR-9-5p,aae-miR-9a,aae-miR-9a,api-miR-9a,nvi-miR-9a,ngi-miR-9a,nlo-miR-9a,asu-miR-9-5p,hco-miR-9,pmi-miR-9-5p,bbe-miR-9-5p
miR-92_1	TATTGCACTCGTCCCGGCCT	20	bma-miR-92
miR-92c-3p_3	ATTGCACTCGTCCCGGCCT	19	ame-miR-92c-3p
miR-92_2	AATTGCACTCGTCCCGGCCTGC	22	dpu-miR-92
