# Supplementary material for: Identification and Characterization of MicroRNAs Involving in Initial Sex Differentiation of Chlamys farreri Gonads
Source: Biology (Basel). 2022 Mar 16;11(3):456. doi: 10.3390/biology11030456 (PMC8945268; doi:10.3390/biology11030456)
Supplement: Supplementary file 1 [file biology-11-00456-s001.zip › Table S5.xlsx]

## Sheet: Sheet1
Table S5. Novel miRNAs from ovary and testis libraries.
novel_miRNA id	Sequence(mature)	Length
novel_miR1	aauugcaccugucccggccugc	22
novel_miR2	uugugcguaggacagcgguugu	22
novel_miR3	uaucacagcagcuuggucagug	22
novel_miR4	ugccgucucccugacuaccugu	22
novel_miR5	uuacccuguagaaccgagcgagu	23
novel_miR6	auuuggcacuuguggaauaauc	22
novel_miR7	cccgugauagcucaguugguag	22
novel_miR7	cccgugauagcucaguugguag	22
novel_miR8	auggaguuguuuuguuguuu	20
novel_miR9	ugucauggaguugcucuuuucu	22
novel_miR10	ucggugggacuuucguucgcuu	22
novel_miR11	acuaccagcugugcauucuac	21
novel_miR12	aggcgagccuaaacgauuccgc	22
novel_miR13	ucacaaccugcaugaaugagggc	23
novel_miR14	ugugucuaggugucgacuugaga	23
novel_miR15	uaucacagccugcuuugaugagc	23
novel_miR16	ccuccggugggguaugccucuacu	24
novel_miR17	cacaaccugcuugaaugagggu	22
novel_miR18	gacaugauuccugacacauggugc	24
novel_miR19	uucucguuucacaggguauauu	22
novel_miR20	aacugaaggaggaucgggugagu	23
novel_miR21	ggcagacggacuagaagauguguuu	25
novel_miR22	ggaguuggaggaugcgugc	19
novel_miR23	uuguuggccccacaauuugu	20
novel_miR24	uaucacagccugcuugguucag	22
novel_miR25	uaucacagccugcuuggacag	21
novel_miR26	uaucacagucugcuuggacagug	23
novel_miR27	uaucacagucagcuuugaucagc	23
novel_miR28	ugacguaaccacucuccgacagcc	24
novel_miR29	aggcaguggcggacgugugucu	22
novel_miR30	uauugcuuuagcccacuguc	20
novel_miR31	ucuuugguguuacggucauagu	22
novel_miR32	ugaguauugauggggucgauaggg	24
novel_miR33	cgauugucuaaugccuggucuga	23
novel_miR34	ccagaucuuuaugcucag	18
novel_miR35	agccccauccauguaagug	19
novel_miR36	ggcgguggcggcggcggcggcggc	24
novel_miR37	aggaguuguaucaugaucg	19
novel_miR38	accggaaugcagugggggcau	21
novel_miR39	ugaaacgucccggauaucuauauca	25
novel_miR40	gucguggccucggcuguuguagc	23
novel_miR41	aagggagcacccgucgacagu	21
novel_miR42	ucuccccaccaucggagucaaugc	24
novel_miR43	ucccgauacucuacguuucag	21
novel_miR44	uggccaugcuacuuguug	18
novel_miR45	ugcuccgacgcaccccaccaugu	23
novel_miR46	aacaacuucuccgcacucuagccag	25
novel_miR47	gaguugucaaccugguccccggu	23
novel_miR48	ugauuuugcuuugguauucggu	22
novel_miR49	aggccagaugaucguaggugauu	23
novel_miR50	ugugguguccgaggcuccugggug	24
novel_miR51	ggcguuagguagagcugugcacagu	25
novel_miR52	aaggccagcgauaugcuacgcu	22
novel_miR53	ucgacuccucgaauccgucagc	22
novel_miR54	gaucucuccaaggccuucggc	21
novel_miR55	uggauuucgacuguggcggaugc	23
novel_miR56	gccuccaguaugcccaacgu	20
novel_miR57	uuucggaccgcucuggaccuuc	22
novel_miR58	uuucggaccuuauuucugauag	22
novel_miR59	ucccacaaaguggaggagugcaugu	25
novel_miR60	gugauggcucccuuguacaauc	22
novel_miR61	uggacugucuuugaccacgugguug	25
novel_miR62	gugggcgcggugccggugggcgugg	25
novel_miR63	acuauguggagcagucgccagg	22
novel_miR64	uggcuguagucuaggugacauucu	24
novel_miR65	caggaguugucuugucuguu	20
novel_miR66	aacaaggaacccuuggcuagcga	23
novel_miR67	agggacuugacacgcucggcguuc	24
novel_miR68	ccuccauuuguuguuuagcuuu	22
novel_miR69	ccaaggauuugcuguguu	18
novel_miR70	aggccgaaggaucuccaucugauu	24
novel_miR71	cgggacgaucacuuggcuggcg	22
novel_miR72	uccgguauguugccucccccccagu	25
novel_miR73	accuugggaacguucaucagcug	23
novel_miR74	gaggcaguaguuaccauaacg	21
novel_miR75	uacugcgagaagaagggacugu	22
novel_miR76	agagauccgacucuguuguccg	22
novel_miR77	ccagccuagccaccgacccaguguu	25
novel_miR78	uggcgccguguaaacaucuaucu	23
novel_miR79	ugaguagcagccgggaccgcccu	23
novel_miR80	acacucccgacgacgucugaccgg	24
novel_miR81	cuuggcacuggcggaauacucac	23
novel_miR82	uuaaguaguggugccgcgggu	21
novel_miR83	cuuggacucacugauggcgcacc	23
novel_miR84	accaaugggaagcgggcgggag	22
novel_miR85	ggagcagccaggacuuggagcacu	24
novel_miR86	uguuucgucagggccucguuaaca	24
novel_miR87	uggacagggagauguuugugguca	24
novel_miR88	auaugacgccguauuuuauugg	22
novel_miR89	gcuuccucgcucacugacucgcu	23
novel_miR90	cugucgguggggguguggggg	21
novel_miR91	aacugucugacgugauuucccucca	25
novel_miR92	gagcuggucauugucugac	19
novel_miR93	gucaaaauguccaaaucagguguca	25
novel_miR94	gugacgacgccgggcugaugaggc	24
novel_miR95	ucauuuugaauguugggguggagga	25
novel_miR96	ugcgagcagaacuaagggcaccu	23
novel_miR97	gugggugccacacuuguaguggc	23
novel_miR98	cugguacauuguagccggac	20
novel_miR99	gugacgagugucguguuggcu	21
novel_miR100	ugauaacaggucuccauggugau	23
novel_miR101	ugucucgcuuggagugccgcccu	23
novel_miR102	ugcccuauccgucagucgcugc	22
novel_miR103	caaagaucuagcugcagccucug	23
